# Supplementary material for: Rational design of metal–nitrogen-codoped carbon nanotube catalysts for CO2 reduction based on NiZn-layered double hydroxides
Source: Royal Society of Chemistry journal article supplement (doi:10.1039/d3nj01363d), 2023-01-01
Supplement: d3nj01363d1.pdf [file d3nj01363d1.pdf]

Electronic Supplementary Information (EIS) for New  
Journal of Chemistry

Rational Design of M-N-CNT Catalyst for CO<sub>2</sub> Reduction  
Based on NiZn Layered Double Hydroxides

*Shuyu Jia<sup>a</sup>, Ping Zhang<sup>a\*</sup>, Hao Chen<sup>a</sup>, Ruishi Xie<sup>a</sup>, Yingke Fu<sup>a</sup>, Lin Chen<sup>a</sup>, Yaping Zhang<sup>a</sup>, Ying Xiong<sup>a\*</sup>*

<sup>a</sup>State Key Laboratory of Environment-friendly Energy Materials, School of Materials Science and Engineering, Southwest University of Science and Technology, Mianyang, 621010, PR China

## **Table of Contents**

1. Supplemental Figures
2. Supplemental Table
3. References

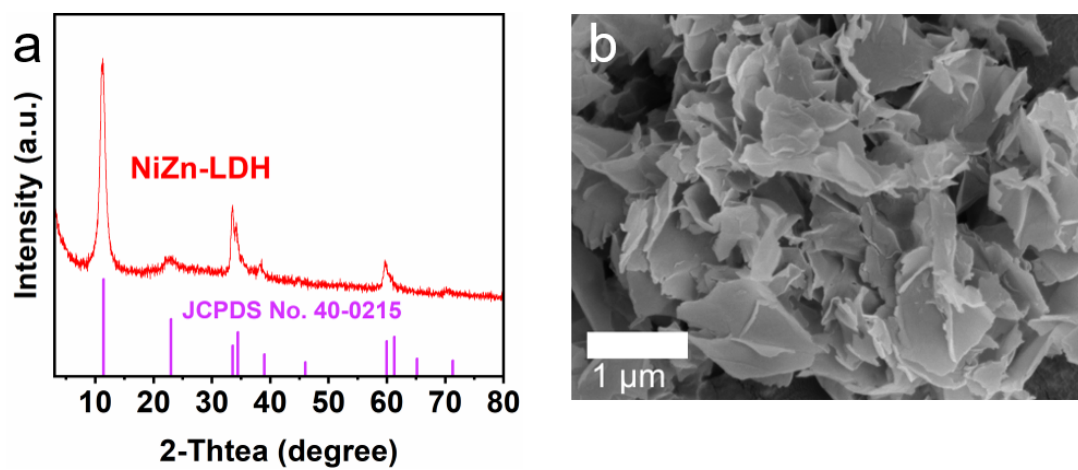

**Fig. S1** (a) XRD pattern and (b) SEM image of NiZn-LDH.

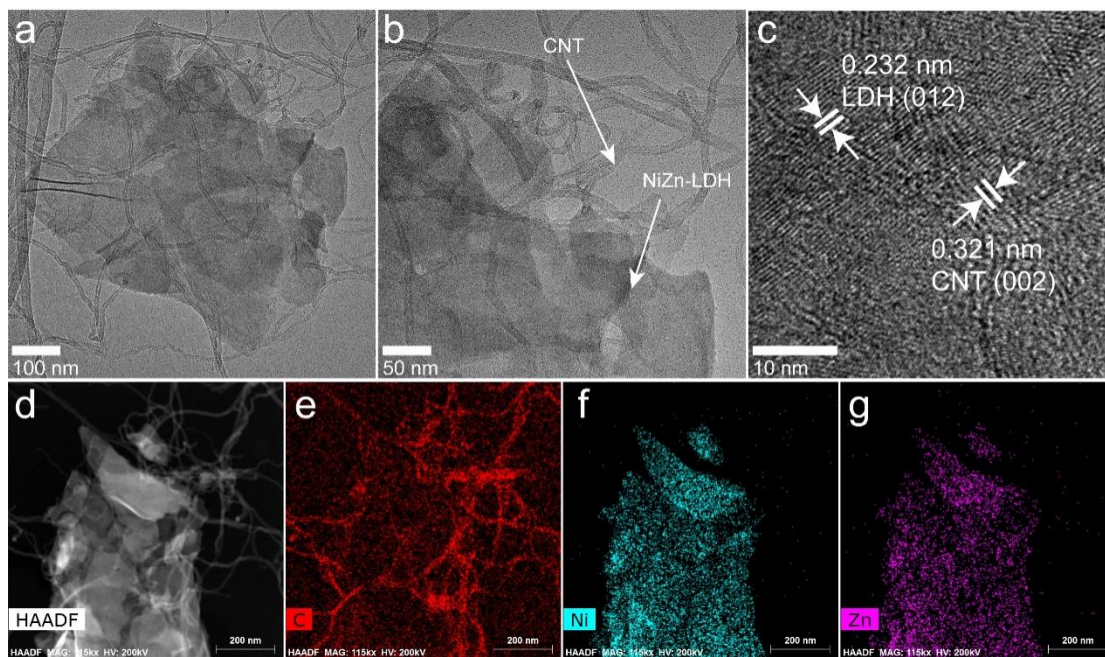

**Fig. S2** (a) ~ (c) TEM images of CNT@NiZn-LDH NS-10, (d) ~ (g) the corresponding elemental mapping images of CNT-N-NiZn-10.

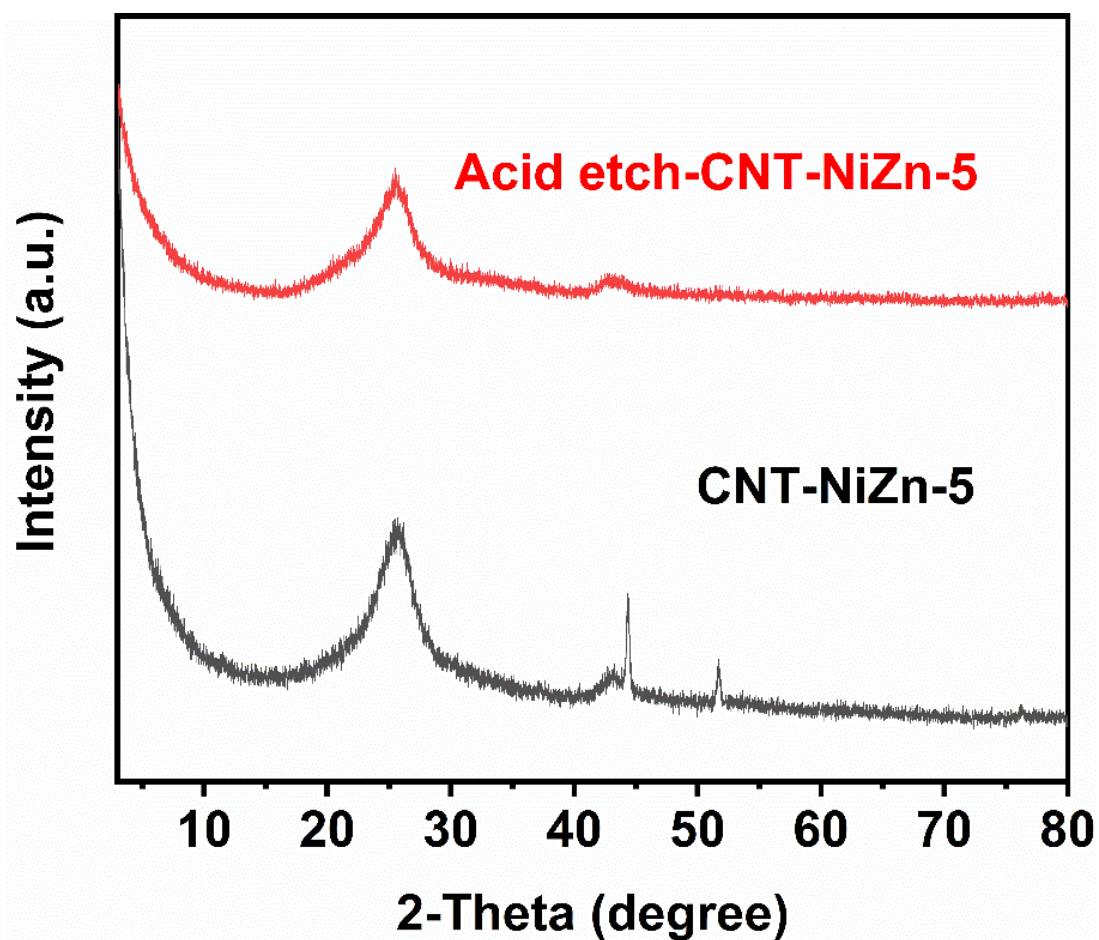

Fig. S3 XRD pattern of CNT-NiZn-5. The characteristic peak belonging to metal nanoparticles in acid etch-CNT-NiZn-5 disappeared, indicating that the metal nanoparticles belonging to CNT-NiZn-5 were removed.

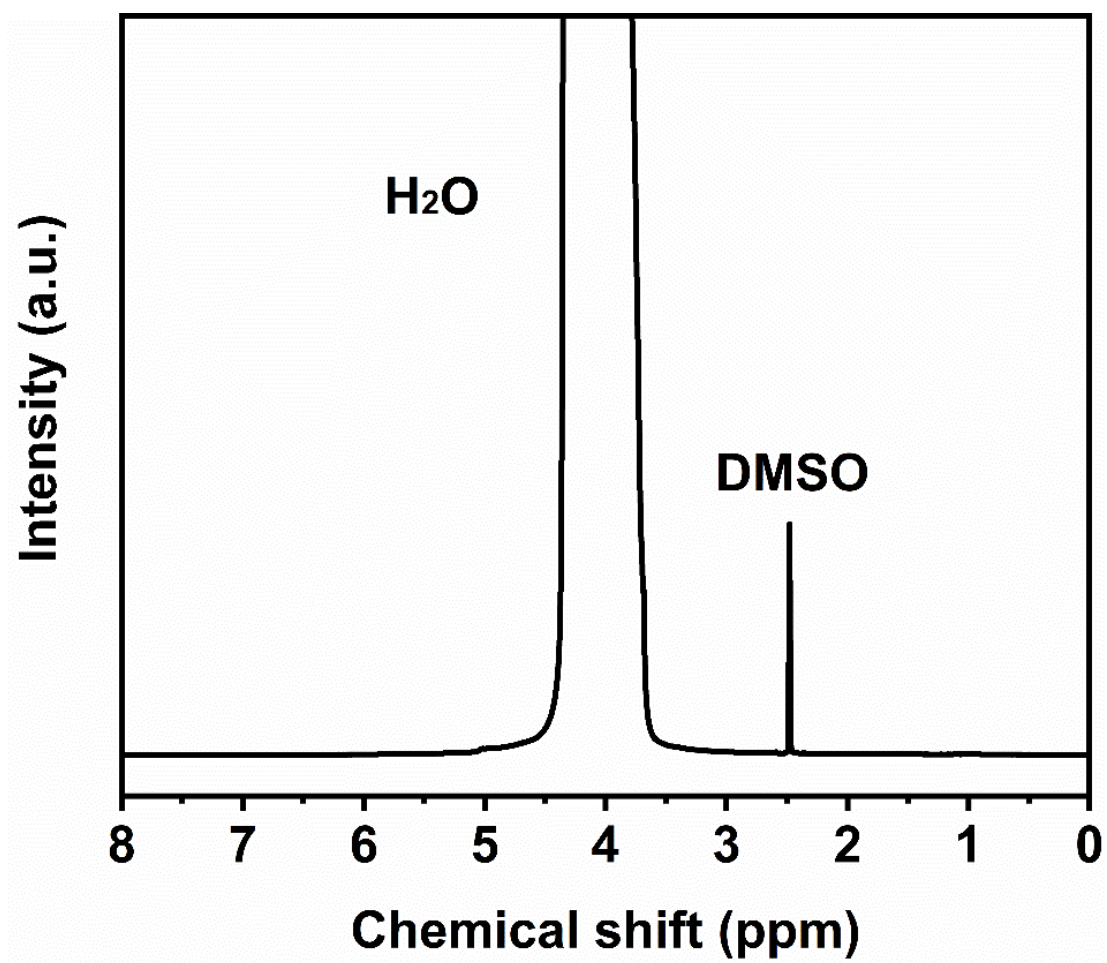

**Fig. S4**  $^1\text{H}$ -NMR spectrum of the electrolyte after the test of CNT-NiZn-10 at  $-0.8\text{ V}$  (vs. RHE). DMSO was added as inner standard.

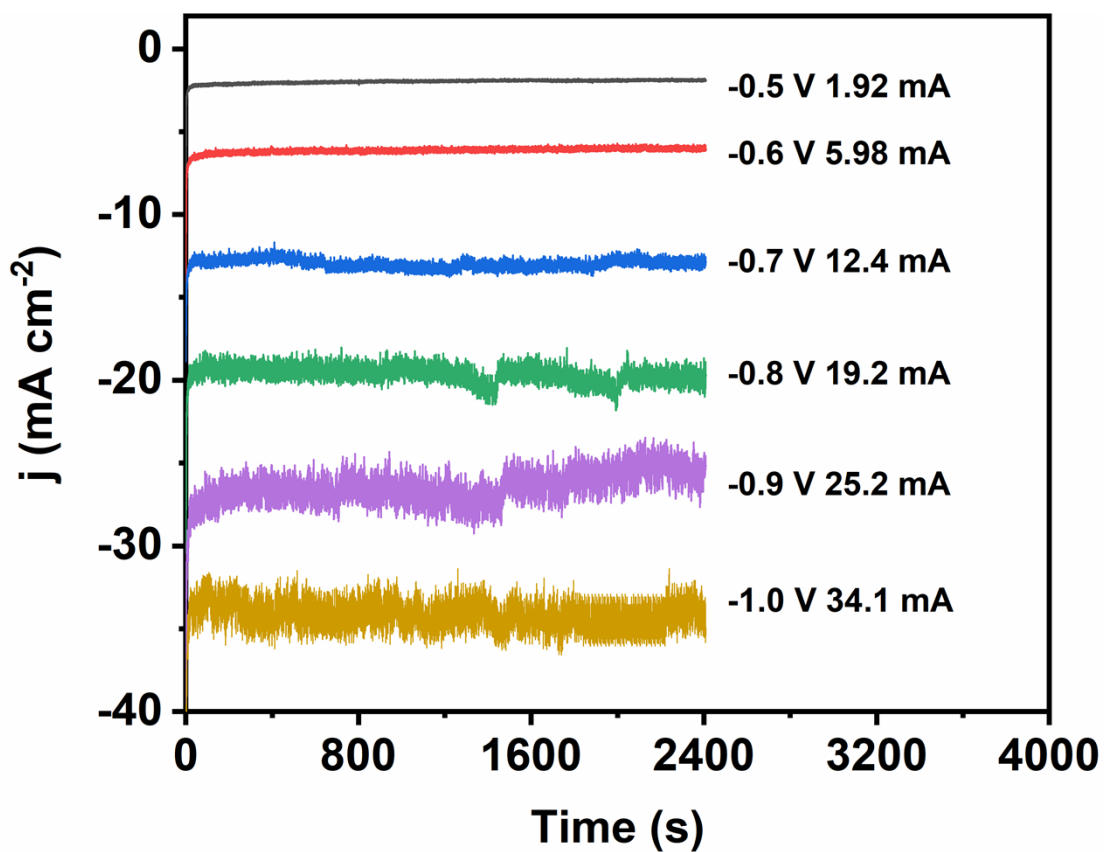

**Fig. S5** it-curve of CNT-NiZn-10. Potentiostatic experiments were conducted at 6 different potentials in the range of  $-0.5$  to  $-1.0$  V vs.

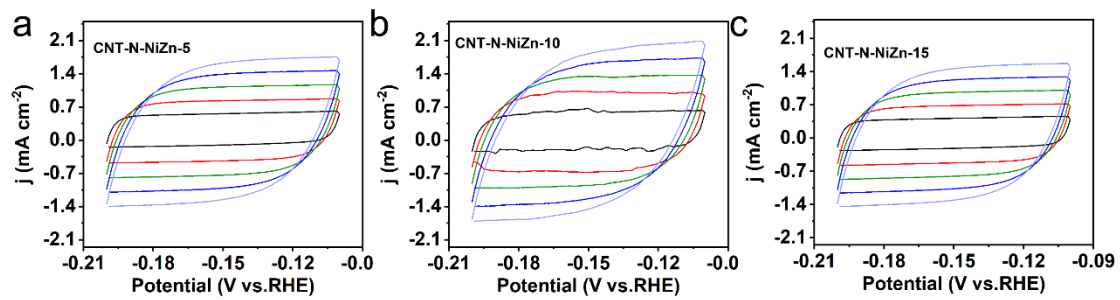

**Fig. S6** The cyclic voltammety curves of (a) CNT-NNiZn-5, (b) CNT-N-NiZn-10, (c) CNT-N-NiZn-15, with various scan rates.



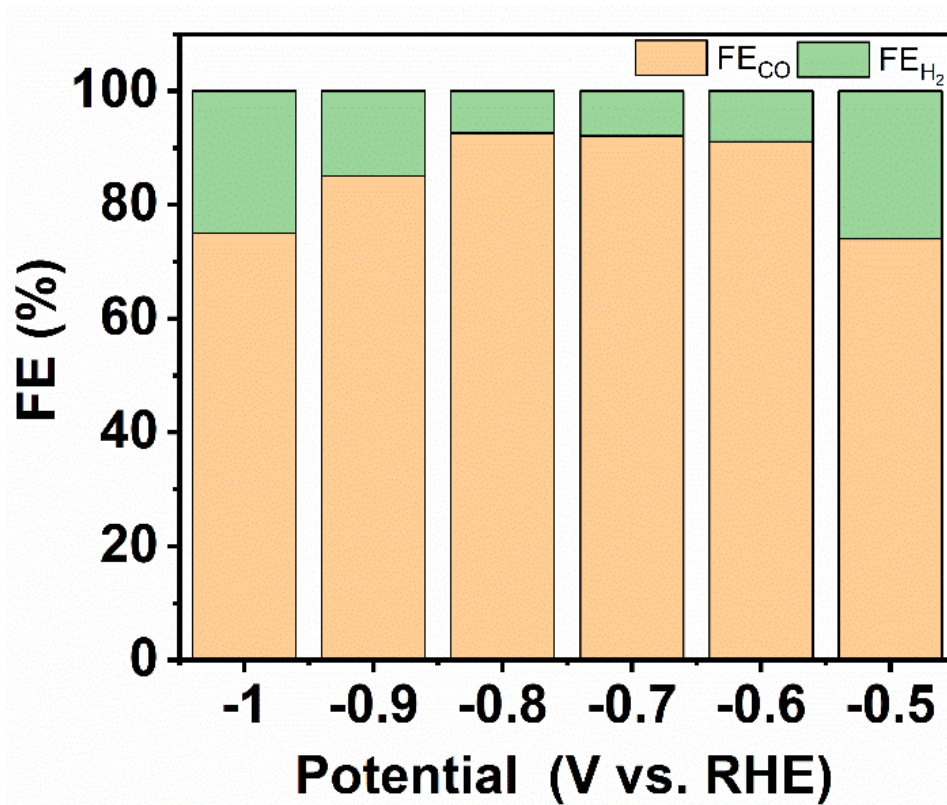

**Fig. S7** The product distribution of CNT-N-NiZn-10 electrocatalytic reduction of carbon dioxide.

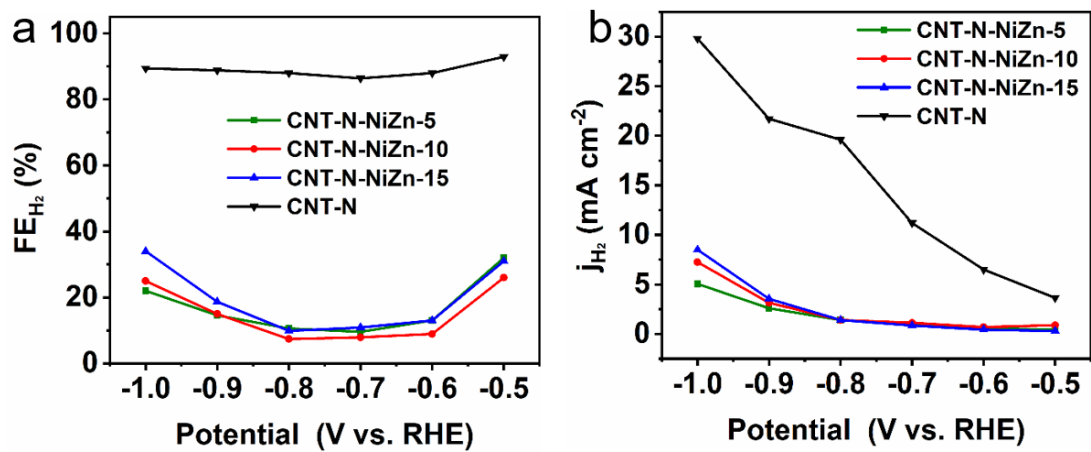

**Fig. S8** (a)  $FE_{H_2}$  at different potentials, (b) current densities of  $H_2$ .

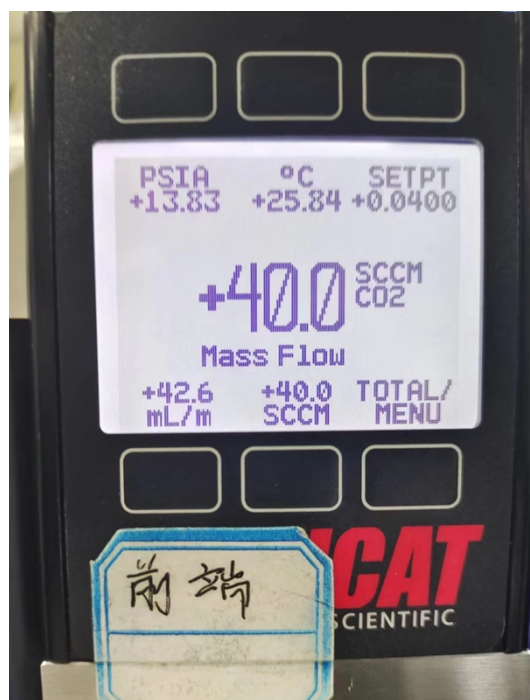

**Fig. S9** The rate of CO<sub>2</sub> injection in the electrochemical test.

**Table S1** Comparison of CO<sub>2</sub> reduction performance on various catalysts.

| Catalysts     | electrolyte             | Potential V (vs. RHE) | FE <sub>CO</sub> (%) | Reference |
|---------------|-------------------------|-----------------------|----------------------|-----------|
| CNT-N-NiZn-10 | 0.5 M KHCO <sub>3</sub> | - 0.8                 | 92.6                 | This work |
| NiSAs/N-C     | 0.5 M KHCO <sub>3</sub> | - 0.89                | 71.9                 | 1         |
| Ni@N-C        | 0.5 M KHCO <sub>3</sub> | - 0.77                | 90                   | 2         |
| CoNi-NC       | 0.1M KHCO <sub>3</sub>  | - 0.5                 | 55                   | 3         |
| Zn-Co@N-C     | 0.5 M KHCO <sub>3</sub> | - 0.53                | 60                   | 4         |
| CNT-N-NiFe    | 0.5 M KHCO <sub>3</sub> | - 0.7                 | 82                   | 5         |
| Cu-Pd NP/C    | 0.1 M KHCO <sub>3</sub> | -0.9                  | 87                   | 6         |
| Co@CoNC       | 0.1 M KHCO <sub>3</sub> | - 0.7                 | 62                   | 7         |
| CuZnO/CNT     | 0.1 M KHCO <sub>3</sub> | - 0.8                 | 50                   | 8         |
| Ni, Fe-N-C    | 0.5 M KHCO <sub>3</sub> | - 1.0                 | 92.37                | 9         |
| AgNNs@Zn      | 0.5 M KHCO <sub>3</sub> | - 0.86                | 91                   | 10        |

## References

- (1) Zhao, C. M.; Dai, X. Y.; Yao, T.; Chen, W. X.; Wang, X. Q.; Wang, J.; Yang, J.; Wei, S. Q.; Wu, Y.; Li, Y. D. Ionic exchange of metal-organic frameworks to access single nickel sites for efficient electroreduction of CO<sub>2</sub>. *J. Am. Chem. Soc.* **2017**, *139*, 8078-8081.
- (2) Meng, J.; Miao, Z.; Zhang, J.; Wang, Z.; Zhang, R.; Xu, L.; Diao, L.; Zhou, J.; Zhuo, S. One-step synthesis of N-doped carbon nanotubes-encapsulated Ni nanoparticles for efficient electrochemical CO<sub>2</sub> reduction to CO. *J. Alloys Compd.* **2023**, *939*, 168798.
- (3) He, Q.; Liu, D. B.; Lee, J. H.; Liu, Y. M.; Xie, Z. H.; Hwang, S.; Kattel, S.; Song, L.; Chen, J. G. Electrochemical conversion of CO<sub>2</sub> to syngas with controllable CO/H<sub>2</sub> ratios over Co and Ni single-atom catalysts. *Angew. Chem. Int. Ed.* **2020**, *59*, 3033-3037.
- (4) Miao, Z. C.; Liu, W. Q.; Zhao, Y. Z.; Wang, F. Y.; Meng, J.; Liang, M. F.; Wu, X. Z.; Zhao, J. P.; Zhuo, S. P.; Zhou, J. Zn-modified Co@N-C composites with adjusted Co particle size as catalysts for the efficient electroreduction of CO<sub>2</sub>. *Catal. Sci. Technol.* **2020**, *10*, 967-977.
- (5) Chen, H.; Zhang, P.; Xie, R. S.; Xiong, Y.; Jia, C. H.; Fu, Y. K.; Song, P. G.; Chen, L.; Zhang, Y. P.; Liao, T. High-temperature nitridation induced carbon nanotubes@NiFe-layered-double-hydroxide nanosheets taking as an oxygen evolution reaction electrocatalyst for CO<sub>2</sub> electroreduction. *Adv. Mater. Interfaces* **2021**, *8*, 2101165.
- (6) Mun, Y.; Lee, S.; Cho, A.; Kim, S.; Han, J. W.; Lee, J. Cu-Pd alloy nanoparticles as highly selective catalysts for efficient electrochemical reduction of CO<sub>2</sub> to CO. *Appl. Catal. B* **2019**, *246*, 82-88.
- (7) Daiyan, R.; Chen, R.; Kumar, P.; Bedford, N. M.; Qu, J.; Cairney, J. M.; Lu, X.; Amal, R. Tunable syngas production through CO<sub>2</sub> electroreduction on cobalt-carbon composite electrocatalyst. *ACS Appl. Mater. Interfaces* **2020**, *12*, 9307-9315.
- (8) Hjorth, I.; Nord, M.; Rønning, M.; Yang, J.; Chen, D. Electrochemical reduction of CO<sub>2</sub> to synthesis gas on CNT supported Cu<sub>x</sub>Zn<sub>1-x</sub>O catalysts. *Catal Today* **2020**, *357*, 311-321.
- (9) Sun, Y.; Chen, K. Y.; Zhao, K.; Chai, B. D.; Wang, X. L.; Wang, W. Electrocatalytic conversion of CO<sub>2</sub> into CO over dual-metal M-N-C catalyst in a flow cell. *J. Environ. Chem. Eng.* **2022**, *10*, 108986.

(10) Zhou, Y. J.; Ni, G. H.; Wu, K. Z.; Chen, Q.; Wang, X. Q.; Zhu, W. W.; He, Z.; Li, H. M.; Fu, J. W.; Liu, M. Porous Zn conformal coating on dendritic-like Ag with enhanced selectivity and stability for CO<sub>2</sub> electroreduction to CO. *Adv. Sustain. Syst.* **2023**, *7*, 2200374.
